# Supplementary material for: Synthesis of MnO2 nanoparticles and their effective utilization as UV protectors for outdoor high voltage polymeric insulators used in power transmission lines
Source: Royal Society of Chemistry journal article supplement (doi:10.1039/c6cp06611a), 2016-01-01
Supplement: c6cp06611a1.pdf [file c6cp06611a1.pdf]

**Electronic Supplementary Information (ESI)**

**Synthesis of MnO<sub>2</sub> nanoparticle and its effective utilization as UV protector  
for outdoor high voltage polymeric insulator used in power transmission  
line**

D. Ghosh, S. Bhandari, D. Khastgir\*

*Rubber Technology Centre, Indian Institute of Technology Kharagpur*

*Kharagpur-721302, West Bengal, India*

\* Corresponding author: Dipak Khastgir

E-mail ID: khasdi@rtc.iitkgp.ernet.in

Phone: +91 - 3222 – 283192

*EDX- analysis of synthesized three different nanoparticles*

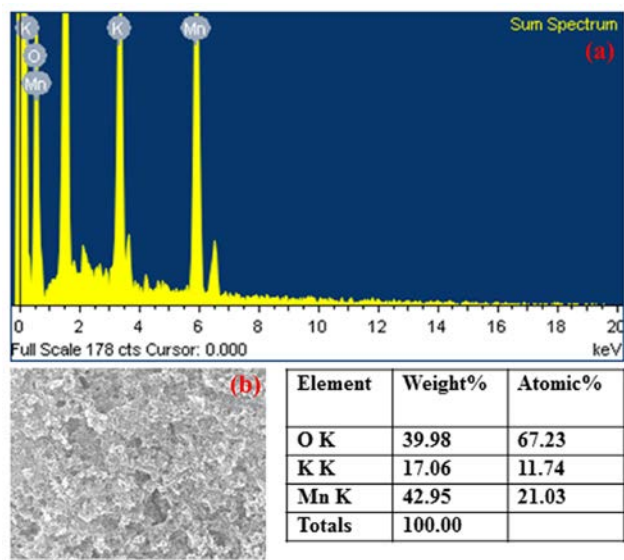

Fig. S1: EDX spectra (a), scan area (b) and elemental composition of synthesized  $\text{MnO}_2$   $\delta$ -nanosheet (NS).

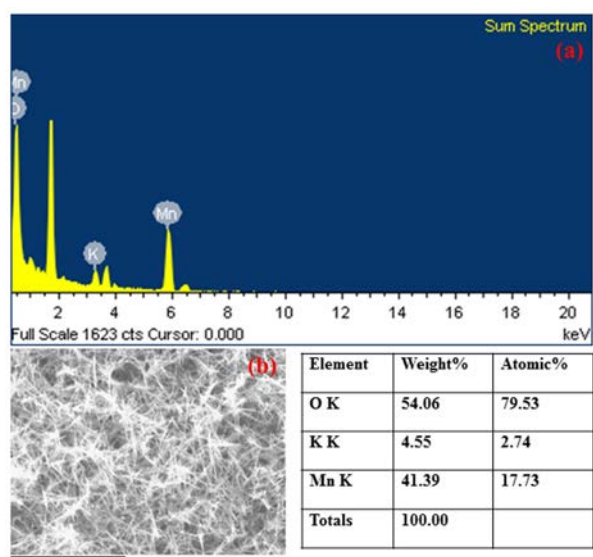

Fig. S2: EDX spectra (a), scan area (b) and elemental composition of synthesized  $\text{MnO}_2$   $\alpha$ -nanowire (NW).

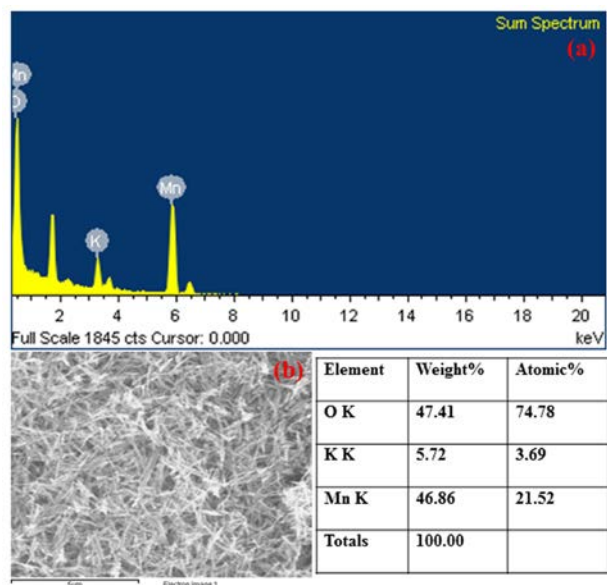

Fig. S3: EDX spectra (a), scan area (b) and elemental composition of synthesized  $\text{MnO}_2$   $\alpha$ -nanorod (NR).

***TEM analysis of  $\alpha$ -nanorod of extended heating***

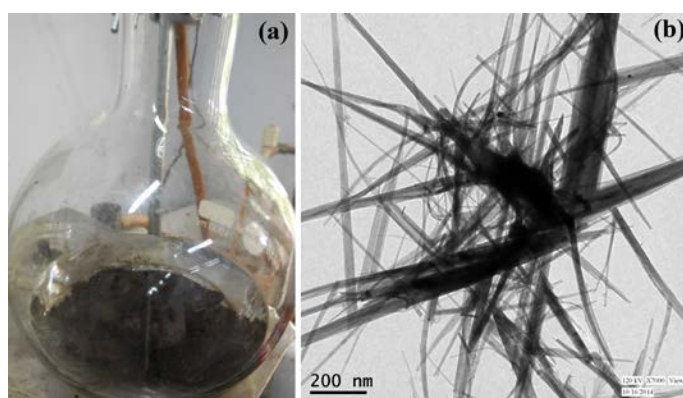

Fig. S4: Digital picture (a) and TEM image (b) of  $\alpha$ - $\text{MnO}_2$  nanorod of extended heating sample.

### Thermogravimetric analysis

Fig S5 represents the thermogravimetric analysis of synthesized different morphological nanoparticles. It was detected from this analysis that all the particles absorbed traces of moisture (weight loss ~1-2 %) due to weight loss at 100°C. It may be due to present of surface hydroxyl group which can absorb traces of moisture. The loss weight at near about 300-400°C may be due to transformation of phase from  $\text{MnO}_2$  to  $\text{Mn}_2\text{O}_3$ <sup>53</sup>.

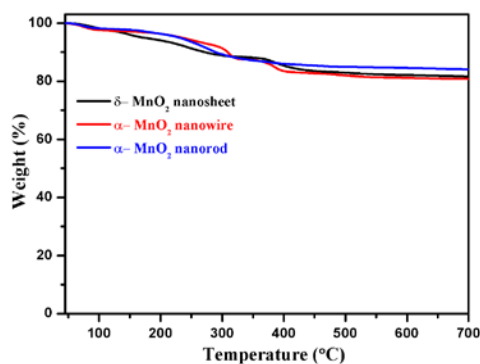

Fig. S5: TGA analysis of  $\delta$ -  $\text{MnO}_2$  nanaosheet (NS),  $\alpha$ -  $\text{MnO}_2$  nanowire (NW) and  $\alpha$ -  $\text{MnO}_2$  nanorod (NR).

### Nanoindentation analysis

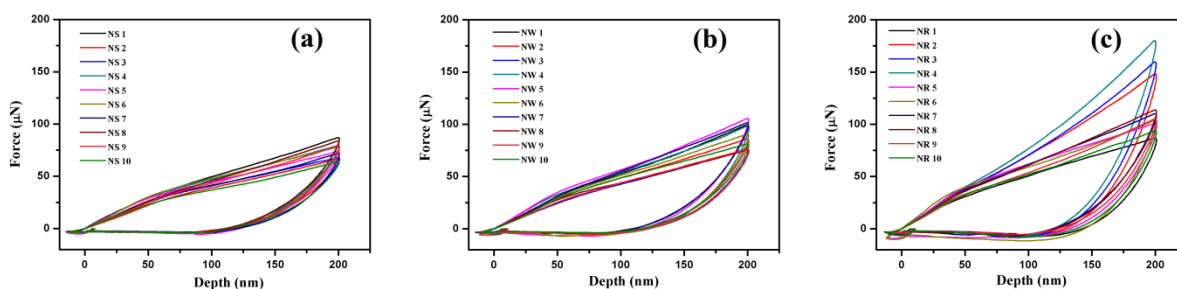

Fig. S6: Force versus depth profile of (a)  $\delta$ -nanosheet (NS), (b)  $\alpha$ - nanowire (NW) and (c)  $\alpha$ -nanorod (NR) under nanoindentation at 10 different places of each type of nanomaterial.

## Electrical properties of $MnO_2$

### Effect of frequency on electrical impedance

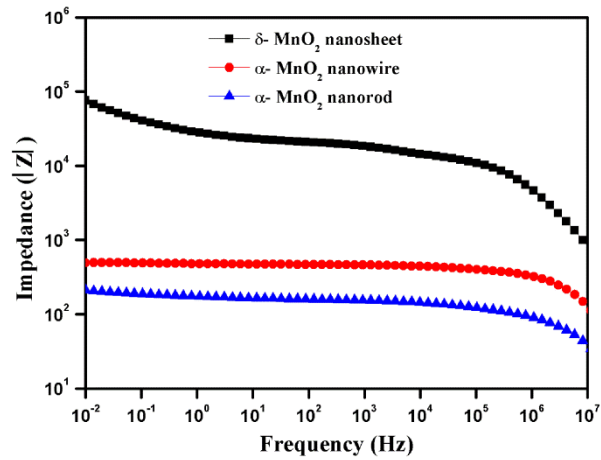

Fig. S7: Variation of impedance of  $\delta$ -  $MnO_2$  nanaosheet (NS),  $\alpha$ -  $MnO_2$  nanowire (NW) and  $\alpha$ -  $MnO_2$  nanorod (NR) with respect to frequency at room temperature.

### Effect of temperature on electrical impedance

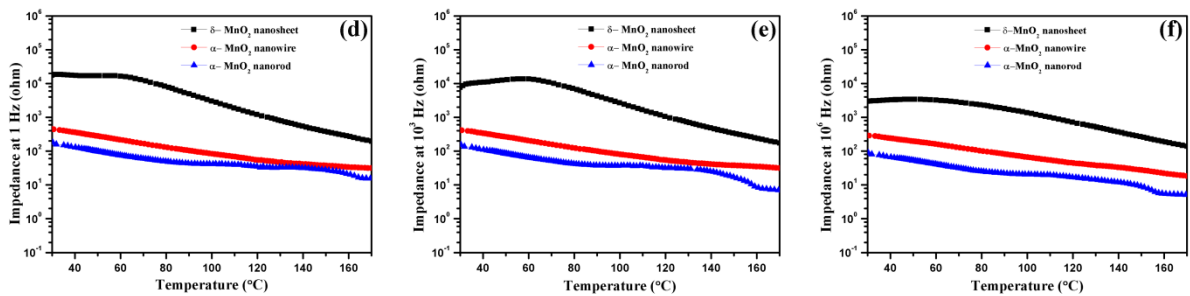

Fig. S8: Variation of impedance of  $\delta$ -  $MnO_2$  nanaosheet (NS),  $\alpha$ -  $MnO_2$  nanowire (NW) and  $\alpha$ -  $MnO_2$  nanorod (NR) with respect to temperature at (a) 1 Hz, (b)  $10^3$  Hz and (c)  $10^6$  Hz frequency.

### *Band gap measurement using UV analysis*

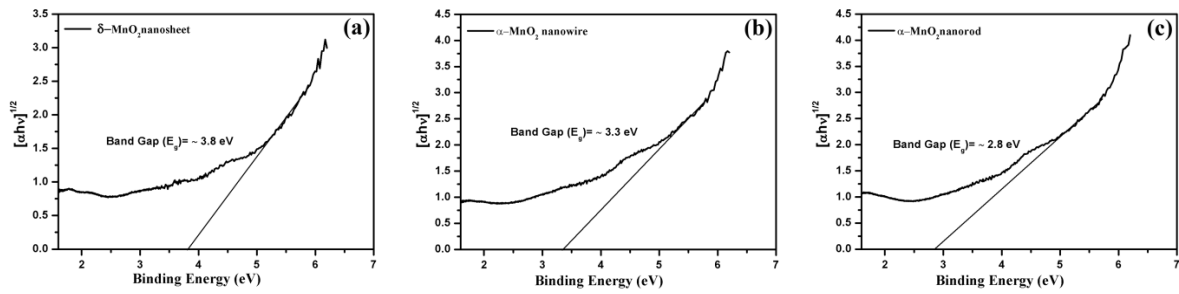

Fig. S9: Band gap analysis of (a)  $\delta$ - MnO<sub>2</sub> nanaosheet (NS), (b)  $\alpha$ - MnO<sub>2</sub> nanowire (NW) and (c)  $\alpha$ - MnO<sub>2</sub> nanorod (NR).

### *Digital picture of synthesized MnO<sub>2</sub> nanoparticle*

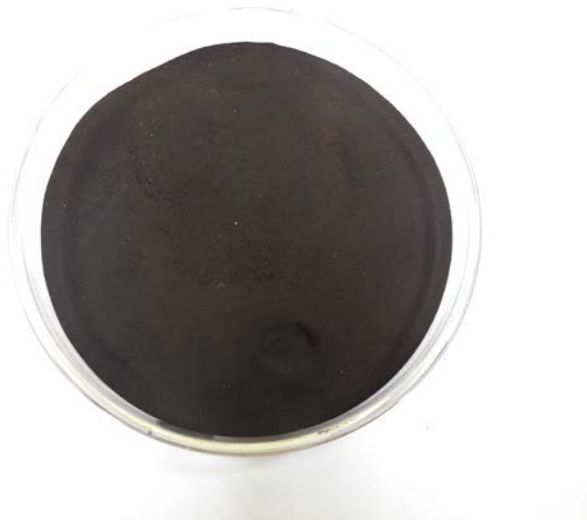

Fig. S10: Digital picture of synthesized  $\delta$ - MnO<sub>2</sub> nanosheet for the preparation of high voltage insulator composite as UV retardant.
